# Supplementary material
Source: Springer Nature journal article supplement (https://www.springermedizin.de/resource/supplementary/12933_2013_757_MOESM9_ESM.pdf/9538914)

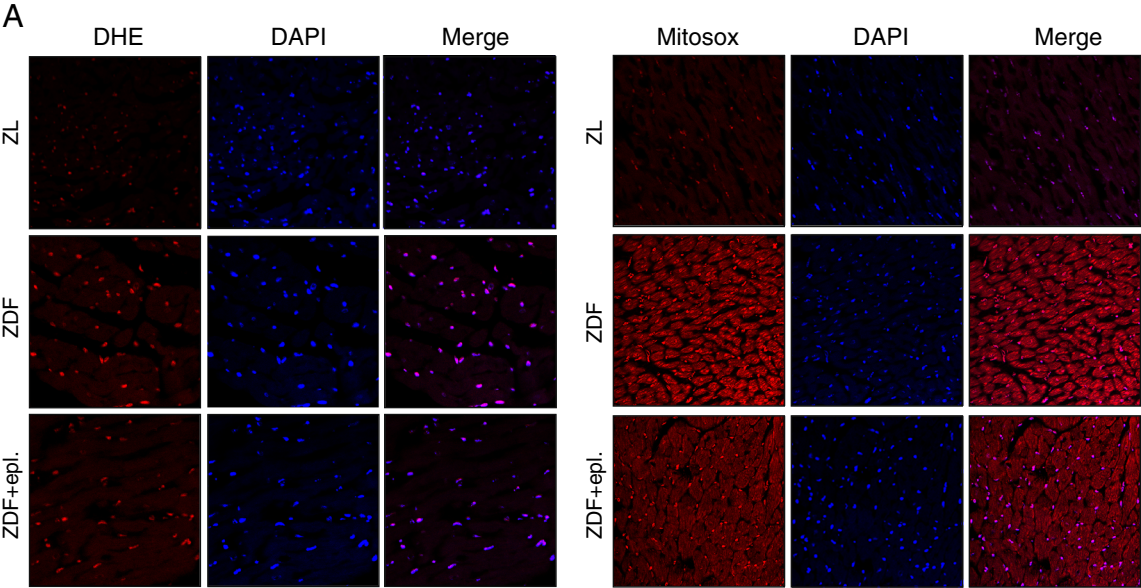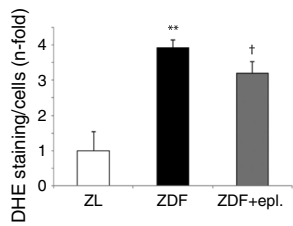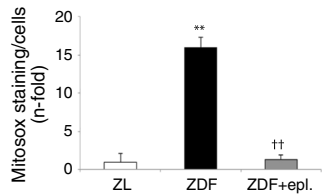

**B**

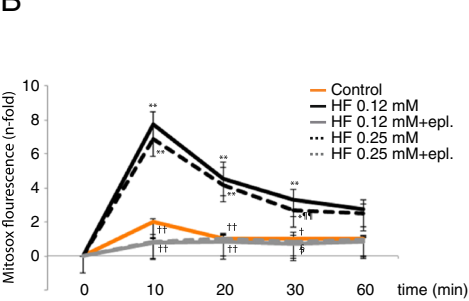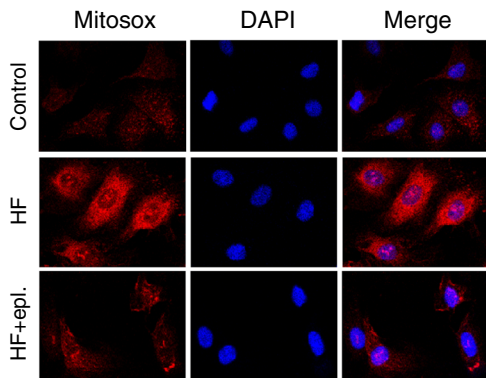

**C**

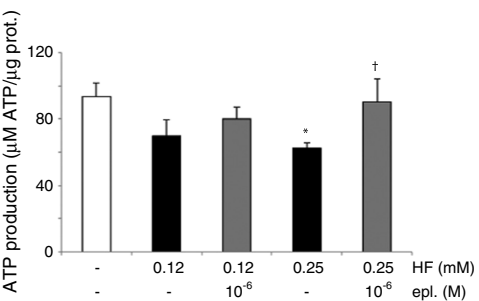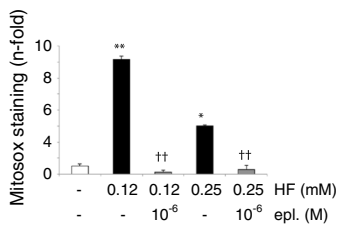

Supplement: MOESM9 [file 9538914]
